# Supplementary material
Source: MDPI journal article supplement (https://www.mdpi.com/2071-1050/14/3/1418)
Supplement: s1 [file s1]

**Supplementary Material:**

**Table S1.** Ecological Footprint of Algiers marine production of 2015.

| Species Scientific name          | FAO CODE | Trophic Level | National Catch | Yield          | IYF  | EQF         | PPR                 | Eff     |
|----------------------------------|----------|---------------|----------------|----------------|------|-------------|---------------------|---------|
| [-]                              | [-]      | [-]           | [t]            | [t wha-1 yr-1] | [-]  | [gha wha-1] | [t C pp/ t ww fish] | [gha]   |
| <i>Sardinella aurita</i>         | 2088     | 3.40          | 1829.26        | 0.12           | 1.00 | 0.37        | 35.45               | 5644.80 |
| <i>Engraulis encrasicolus</i>    | 2106     | 3.11          | 174.84         | 0.23           | 1.00 | 0.37        | 18.18               | 276.71  |
| <i>Anguilla anguilla</i>         | 2203     | 3.53          | 0.12           | 0.09           | 1.00 | 0.37        | 47.81               | 0.48    |
| <i>Epinephelus costae</i>        |          |               | 0.02           | 30.12          | 1.00 | 0.37        | 0.14                | 0.00    |
| <i>Dicentrarchus labrax</i>      | 2291     | 3.79          | 0.67           | 0.05           | 1.00 | 0.37        | 87.01               | 5.05    |
| <i>Lophius spp</i>               | 3378     | 4.48          | 0.67           | 0.01           | 1.00 | 0.37        | 426.15              | 24.75   |
| <i>Pagellus spp</i>              | 3172     | 3.53          | 1.34           | 30.12          | 1.00 | 0.37        | 0.14                | 0.02    |
| <i>Boops boops</i>               | 2385     | 2.97          | 2.09           | 0.32           | 1.00 | 0.37        | 13.17               | 2.39    |
| <i>Sarda sarda</i>               | 2471     | 4.50          | 71.10          | 0.01           | 1.00 | 0.37        | 446.23              | 2761.97 |
| <i>Sphyræna spp</i>              | 2255     | 4.32          | 30.31          | 0.01           | 1.00 | 0.37        | 294.82              | 778.02  |
| <i>Loligo spp</i>                | 2712     | 3.50          | 2.92           | 0.10           | 1.00 | 0.37        | 44.62               | 11.35   |
| <i>Squalus acanthias</i>         | 2834     | 4.30          | 0.48           | 0.02           | 1.00 | 0.37        | 281.55              | 11.67   |
| <i>Trachurus spp</i>             | 2305     | 3.58          |                | 0.08           | 1.00 | 0.37        | 53.65               | 0.00    |
| <i>Scombridae</i>                | 3273     | 4.20          |                | 0.02           | 1.00 | 0.37        | 223.65              | 0.00    |
| <i>Scyllarides latus</i>         | 16323    | 2.96          | 0.52           | 0.33           | 1.00 | 0.37        | 12.83               | 0.58    |
| <i>Balistes carolinensis</i>     | 3373     | 3.55          | 0.10           | 0.08           | 1.00 | 0.37        | 50.07               | 0.44    |
| <i>Conger conger</i>             | 2994     | 4.29          | 0.01           | 0.02           | 1.00 | 0.37        | 275.14              | 0.17    |
| <i>Sciaena umbra</i>             | 3149     | 3.70          |                | 0.06           | 1.00 | 0.37        | 70.72               | 0.00    |
| <i>Palaemon longirostris</i>     | 16488    | 2.70          | 0.22           | 0.60           | 1.00 | 0.37        | 7.07                | 0.13    |
| <i>Crangon crangon</i>           | 3435     | 3.19          |                | 0.19           | 1.00 | 0.37        | 21.86               | 0.00    |
| <i>Aristeus antennatus</i>       | 3422     | 2.30          | 74.33          | 1.51           | 1.00 | 0.37        | 2.82                | 18.22   |
| <i>Parapenaeus longirostris</i>  | 2598     | 3.31          | 1.43           | 0.15           | 1.00 | 0.37        | 28.81               | 3.57    |
| <i>Dentex dentex</i>             | 3182     | 4.50          |                | 0.01           | 1.00 | 0.37        | 446.23              | 0.00    |
| <i>Clupeoidei</i>                | 2073     | 3.21          | 9.42           | 0.19           | 1.00 | 0.37        | 22.89               | 18.77   |
| <i>Osteichthyes</i>              | 3385     | 3.10          | 4.91           | 0.24           | 1.00 | 0.37        | 17.76               | 7.59    |
| <i>Sparus aurata</i>             | 2384     | 3.26          | 4.53           | 0.17           | 1.00 | 0.37        | 25.68               | 10.13   |
| <i>Xiphias gladius</i>           | 2503     | 4.49          | 25.53          | 0.01           | 1.00 | 0.37        | 436.08              | 969.07  |
| <i>Phycis blennoides</i>         | 2223     | 3.73          | 3.65           | 0.06           | 1.00 | 0.37        | 75.78               | 24.05   |
| <i>Trigla lyra</i>               | 2530     | 3.65          | 0.28           | 0.07           | 1.00 | 0.37        | 63.03               | 1.56    |
| <i>Scylliorhinus stellaris</i>   | 2805     | 4.03          | 0.10           | 0.03           | 1.00 | 0.37        | 151.20              | 1.30    |
| <i>Pagellus bogaraveo</i>        | 3173     | 3.73          | 0.47           | 0.06           | 1.00 | 0.37        | 75.78               | 3.07    |
| <i>Homarus gammarus</i>          | 2648     | 2.60          | 0.00           | 0.76           | 1.00 | 0.37        | 5.62                | 0.00    |
| <i>Palinurus spp</i>             | 3451     | 3.20          | 0.93           | 0.19           | 1.00 | 0.37        | 22.36               | 1.82    |
| <i>Nephrops norvegicus</i>       | 2647     | 2.60          | 0.08           | 0.76           | 1.00 | 0.37        | 5.62                | 0.04    |
| <i>Limanda limanda</i>           | 3361     | 3.29          | 0.05           | 0.15           | 1.00 | 0.37        | 27.51               | 0.11    |
| <i>Seriola rivoliana</i>         | 15250    | 4.50          | 3.42           | 0.01           | 1.00 | 0.37        | 446.23              | 132.75  |
| <i>Scomber scombrus</i>          | 2473     | 3.65          | 3.73           | 0.07           | 1.00 | 0.37        | 63.03               | 20.44   |
| <i>Lithognathus mormyrus</i>     | 2392     | 3.42          | 1.66           | 0.11           | 1.00 | 0.37        | 37.12               | 5.37    |
| <i>Auxis rochei</i>              | 2492     | 4.13          | 0.09           | 0.02           | 1.00 | 0.37        | 190.35              | 1.47    |
| <i>Merlangius merlangus</i>      | 3022     | 4.37          | 2.97           | 0.01           | 1.00 | 0.37        | 330.80              | 85.39   |
| <i>Merluccius merluccius</i>     | 2238     | 4.42          | 5.12           | 0.01           | 1.00 | 0.37        | 371.16              | 165.31  |
| <i>Epinephelus spp</i>           | 2278     | 3.90          | 0.12           | 0.04           | 1.00 | 0.37        | 112.09              | 1.21    |
| <i>Mytilus galloprovincialis</i> | 3529     | 2.10          |                | 2.39           | 1.00 | 0.37        | 1.78                | 0.00    |

|                                |       |      |         |      |      |      |        |          |
|--------------------------------|-------|------|---------|------|------|------|--------|----------|
| <i>Mugilidae</i>               | 2256  | 2.43 | 6.90    | 1.12 | 1.00 | 0.37 | 3.80   | 2.28     |
| <i>Phycis phycis</i>           | 2224  | 4.26 |         | 0.02 | 1.00 | 0.37 | 256.78 | 0.00     |
| <i>Oblada melanura</i>         | 2377  | 3.03 | 1.76    | 0.28 | 1.00 | 0.37 | 15.12  | 2.31     |
| <i>Belone belone</i>           | 2208  | 4.21 | 0.18    | 0.02 | 1.00 | 0.37 | 228.86 | 3.55     |
| <i>Pagellus erythrinus</i>     | 2368  | 3.40 | 9.96    | 0.12 | 1.00 | 0.37 | 35.45  | 30.74    |
| <i>Pagellus acarne</i>         | 3174  | 3.48 | 56.85   | 0.10 | 1.00 | 0.37 | 42.61  | 210.90   |
| <i>Pagrus pagrus</i>           | 2381  | 3.65 | 3.56    | 0.07 | 1.00 | 0.37 | 63.03  | 19.52    |
| <i>Orcynopsis unicolor</i>     | 2474  | 4.50 | 0.60    | 0.01 | 1.00 | 0.37 | 446.23 | 23.19    |
| <i>Trachinotus ovatus</i>      | 3117  | 3.73 | 0.07    | 0.06 | 1.00 | 0.37 | 75.78  | 0.46     |
| <i>Dasyatis pastinaca</i>      | 11806 | 4.05 | 0.02    | 0.03 | 1.00 | 0.37 | 158.33 | 0.28     |
| <i>Scyliorhinus spp</i>        | 2804  | 3.95 | 0.42    | 0.03 | 1.00 | 0.37 | 125.77 | 4.64     |
| <i>Spicara smarvis</i>         | 3652  | 3.00 | 0.00    | 0.30 | 1.00 | 0.37 | 14.11  | 0.00     |
| <i>Octopodidae</i>             | 3569  | 3.20 | 11.86   | 0.19 | 1.00 | 0.37 | 22.36  | 23.09    |
| <i>Rajiformes</i>              | 2845  | 3.69 | 1.67    | 0.06 | 1.00 | 0.37 | 69.11  | 10.05    |
| <i>Elasmobranchii</i>          | 2575  | 3.60 |         | 0.08 | 1.00 | 0.37 | 56.18  | 0.00     |
| <i>Scorpaenidae</i>            | 2521  | 3.77 | 7.65    | 0.05 | 1.00 | 0.37 | 83.09  | 55.37    |
| <i>Prionace glauca</i>         | 2018  | 4.24 | 0.34    | 0.02 | 1.00 | 0.37 | 245.22 | 7.15     |
| <i>Alopias vulpinus</i>        | 2008  | 4.50 | 0.18    | 0.01 | 1.00 | 0.37 | 446.23 | 6.99     |
| <i>Mullus spp</i>              | 2401  | 3.34 |         | 0.14 | 1.00 | 0.37 | 30.87  | 0.00     |
| <i>Mullus barbatus</i>         | 3208  | 3.15 | 36.98   | 0.21 | 1.00 | 0.37 | 19.93  | 64.18    |
| <i>Mullus surmuletus</i>       | 3207  | 3.42 | 26.98   | 0.11 | 1.00 | 0.37 | 37.12  | 87.19    |
| <i>Zeus faber</i>              | 2250  | 4.50 |         | 0.01 | 1.00 | 0.37 | 446.23 | 0.00     |
| <i>Diplodus sargus</i>         | 2370  | 3.04 | 5.23    | 0.27 | 1.00 | 0.37 | 15.47  | 7.05     |
| <i>Sardina pilchardus</i>      | 2910  | 3.05 | 1686.38 | 0.27 | 1.00 | 0.37 | 15.83  | 2324.50  |
| <i>Sardinella spp</i>          | 2084  | 2.82 |         | 0.46 | 1.00 | 0.37 | 9.32   | 0.00     |
| <i>Sarpa salpa</i>             | 2397  | 2.00 | 27.72   | 3.01 | 1.00 | 0.37 | 1.41   | 3.41     |
| <i>Trachurus trachurus</i>     | 2306  | 3.64 | 218.94  | 0.07 | 1.00 | 0.37 | 61.60  | 1174.07  |
| <i>Sepia officinalis</i>       | 2711  | 3.55 | 8.31    | 0.08 | 1.00 | 0.37 | 50.07  | 36.23    |
| <i>Serranidae</i>              | 3069  | 3.89 |         | 0.04 | 1.00 | 0.37 | 109.54 | 0.00     |
| <i>Seriola dumerili</i>        | 3119  | 4.50 | 0.69    | 0.01 | 1.00 | 0.37 | 446.23 | 26.61    |
| <i>Solea solea</i>             | 3367  | 3.13 | 0.16    | 0.22 | 1.00 | 0.37 | 19.04  | 0.26     |
| <i>Squalidae</i>               | 2831  | 4.30 | 0.87    | 0.02 | 1.00 | 0.37 | 281.55 | 21.42    |
| <i>Squilla mantis</i>          | 3392  | 2.60 | 0.61    | 0.76 | 1.00 | 0.37 | 5.62   | 0.30     |
| <i>Sarpa salpa</i>             | 2397  | 2.00 | 0.73    | 3.01 | 1.00 | 0.37 | 1.41   | 0.09     |
| <i>Dasyatis pastinaca</i>      | 11806 | 4.05 |         | 0.03 | 1.00 | 0.37 | 158.33 | 0.00     |
| <i>Thunnus thynnus</i>         | 3296  | 4.43 | 0.34    | 0.01 | 1.00 | 0.37 | 379.81 | 11.18    |
| <i>Euthynnus alletteratus</i>  | 3293  | 4.49 | 5.03    | 0.01 | 1.00 | 0.37 | 436.08 | 190.81   |
| <i>Psetta maxima</i>           | 2563  | 3.96 | 0.00    | 0.03 | 1.00 | 0.37 | 128.69 | 0.00     |
| <i>Trachinus draco</i>         | 2433  | 4.18 | 0.05    | 0.02 | 1.00 | 0.37 | 213.58 | 0.89     |
| <b>Total Marine Production</b> |       |      | 4378.46 |      |      |      |        | 15338.48 |
